# Supplementary material
Source: ML conference proceedings conference paper supplement (https://openaccess.thecvf.com/content/CVPR_2019/html/Zhang_Cascaded_Generative_and_CVPR_2019_paper.html)
Supplement: Supplementary file 1 [file Zhang_Cascaded_Generative_and_CVPR_2019_supplemental.pdf]

# Supplementary Material – Cascaded Generative and Discriminative Learning for Microcalcification Detection in Breast Mammograms

Fandong Zhang<sup>1,5\*</sup> Ling Luo<sup>2,3\*</sup> Xinwei Sun<sup>2,5</sup> Zhen Zhou<sup>2,5</sup> Xiuli Li<sup>2,5</sup>  
Yizhou Yu<sup>2</sup> Yizhou Wang<sup>2,4,5</sup>

<sup>1</sup>Center for Data Science, Peking University <sup>2</sup>Deepwise AI Lab

<sup>3</sup>School of Cyberspace Security, Beijing University of Posts and Telecommunications

<sup>4</sup>Computer Science Department, School of EECS, Peking University <sup>5</sup>Peng Cheng Laboratory

{fd.zhang, z.zhou, yizhou.wang}@pku.edu.cn {luoling, sunxinwei, lixiuli, yuyizhou}@deepwise.com

In this document, we provide additional materials to supplement our main submission. In the first section, we provide reconstruction results of different settings of T-test loss. In the second section, we show additional detection results on INbreast dataset and in-house dataset, which demonstrates that our model outperforms our baseline methods on tiny or concealed microcalcifications ( $\mu$ Cs). In the third section, we provide the split of train/valid/test sets on INbreast dataset in our experiments.

## 1. Setting loss type

In Sec. 3.1.2 of our main paper, we have the following equations:

$$r(I) = |f(\Theta; I) - I| = \sum_{\mathcal{P} \in I} |f(\Theta; \mathcal{P}) - \mathcal{P}| \left( f(\Theta; \mathcal{P}) \triangleq f(\Theta; I)[\mathcal{P}] \right) \quad (1)$$

$$\mathcal{L} = \max(\beta - \bar{r}_p, 0) + \bar{r}_n + \lambda_p S_{r_p}^2 + \lambda_n S_{r_n}^2 \quad (2)$$

Here we represent and compare the reconstruction results of different settings of reconstruction residual loss.

**L1:** original T-test Loss proposed in our paper.

**L2:** replace L1 loss in Eq.1 with L2 loss.

**Huber's Loss:**  $\lambda_p$  and  $\lambda_n$  in Eq.2 are set to be 0, so the loss function becomes  $\mathcal{L} = \max(\beta - \bar{r}_p, 0) + \bar{r}_n$ , which can be treated as a variation of Huber Loss according to our derivation in Sec. 3.1.3 of our main paper.

**Normal Rec:** Only use negative samples (normal tissues) to train the model, of which the loss function is  $\mathcal{L} = \bar{r}_n$ .

As shown in Fig.1, **L2** leads to similar reconstructions to **L1**. We also find **Huber's Loss** tends to miss several indistinct  $\mu$ Cs with more false positives. This indicates that constraints on  $S_{r_p}^2$  and  $S_{r_n}^2$  are necessary, which can enhance the reconstruction residual of positive pixels while reducing the negative ones. **Normal Rec** reconstructs both  $\mu$ Cs and normal tissues well. The model seems to collapse into a simple blurring function.

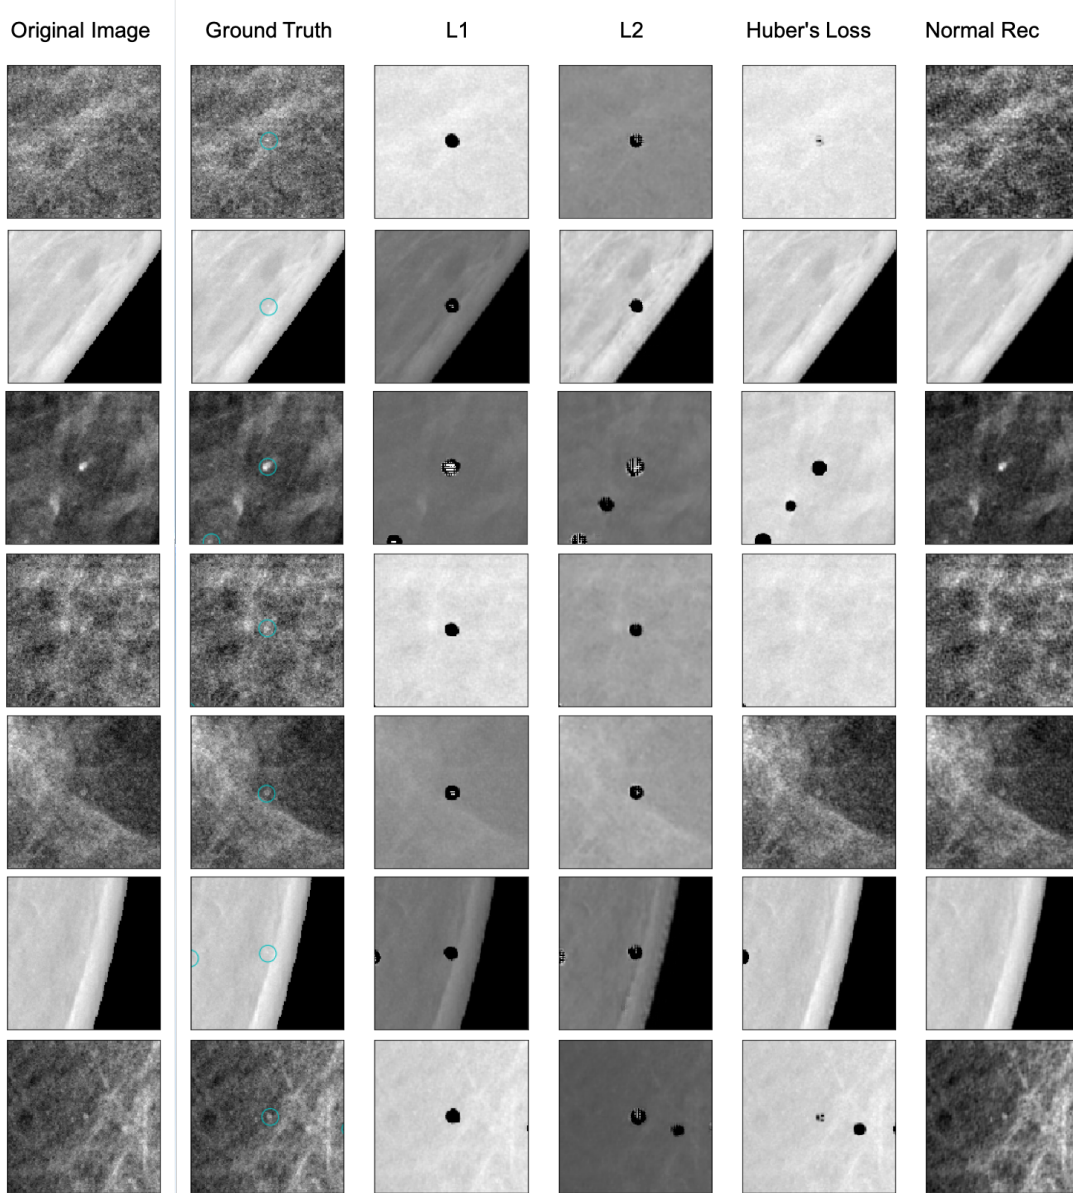

Figure 1. Reconstruction results under different settings of reconstruction residual loss.

## 2. Detection results

We next provide additional detection results with a focus on demonstrating the detection of multiple or concealed  $\mu$ Cs.

**INbreast:** We first present additional results on INbreast in Fig.2 and Fig.3. These results demonstrate that our model is ideally suited for detecting  $\mu$ Cs with irregular shape or tiny size.

**in-house dataset:** We show our results on in-house dataset in Fig.4 Fig.5 Fig.6 and Fig.7. Compared with INbreast, in-house dataset has a variety of background and image contrast. While our baselines show disability in discovering  $\mu$ Cs with low contrast or hidden in normal tissues, the proposed method is robust on these occasions.

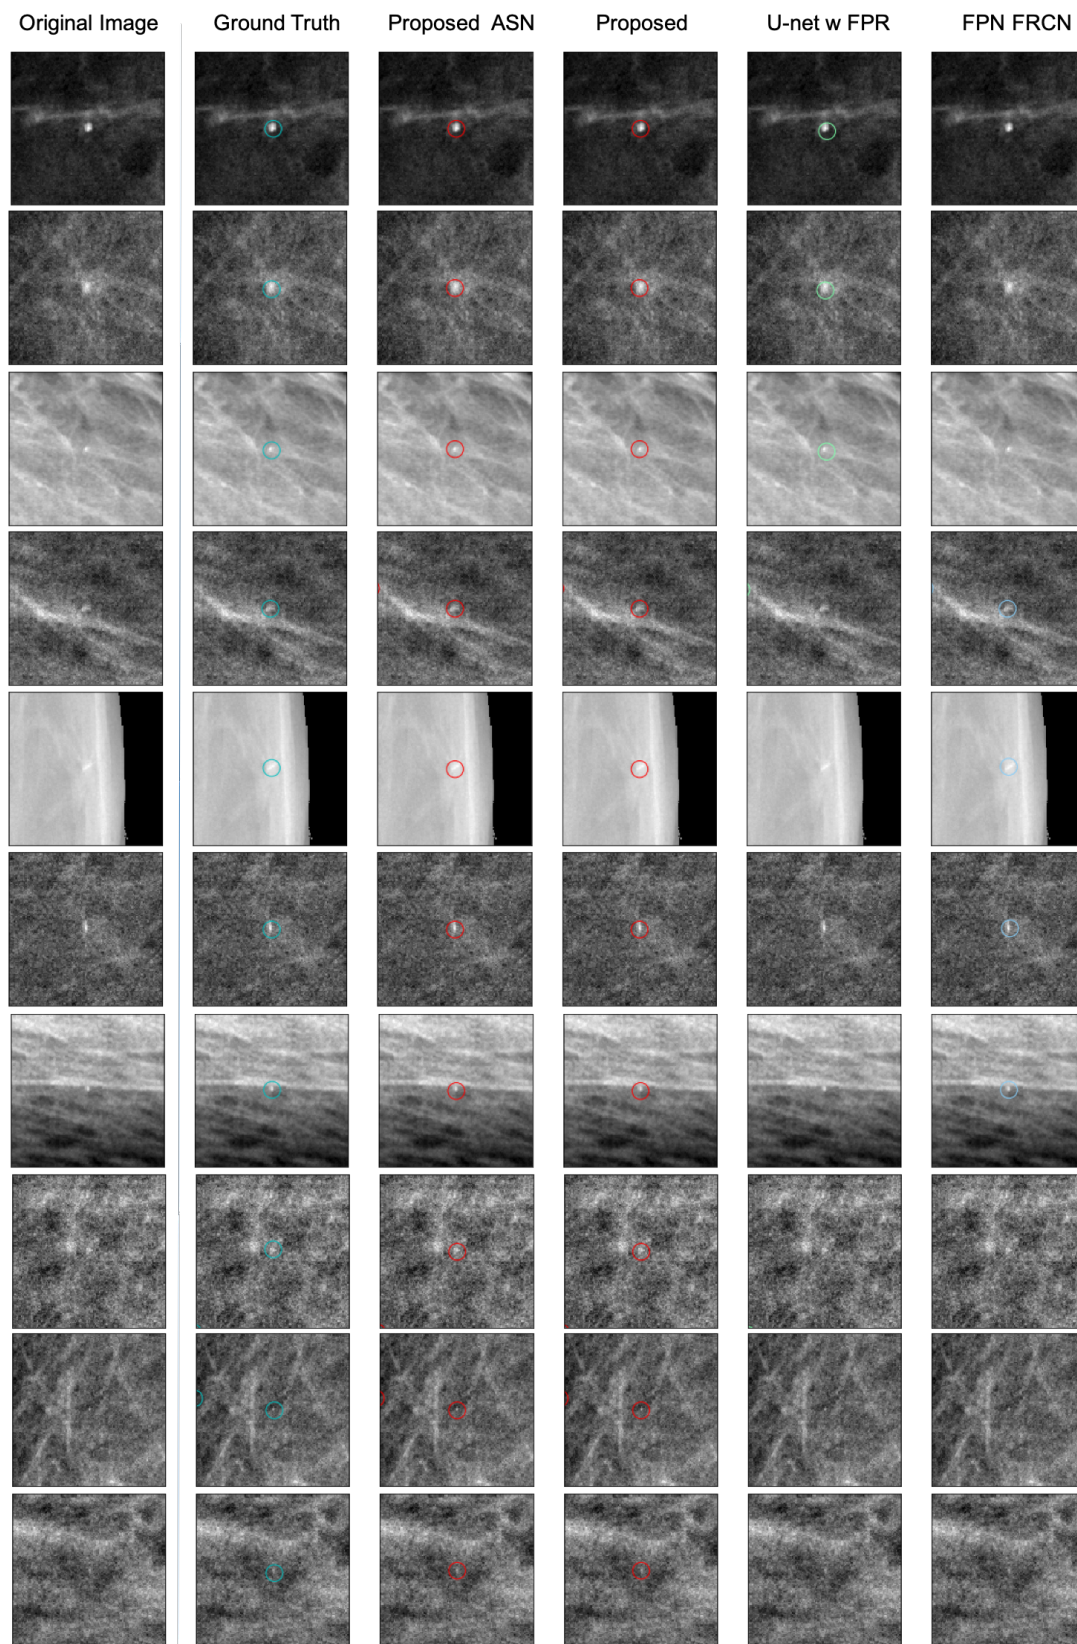

Figure 2. Additional detection results of INbreast.



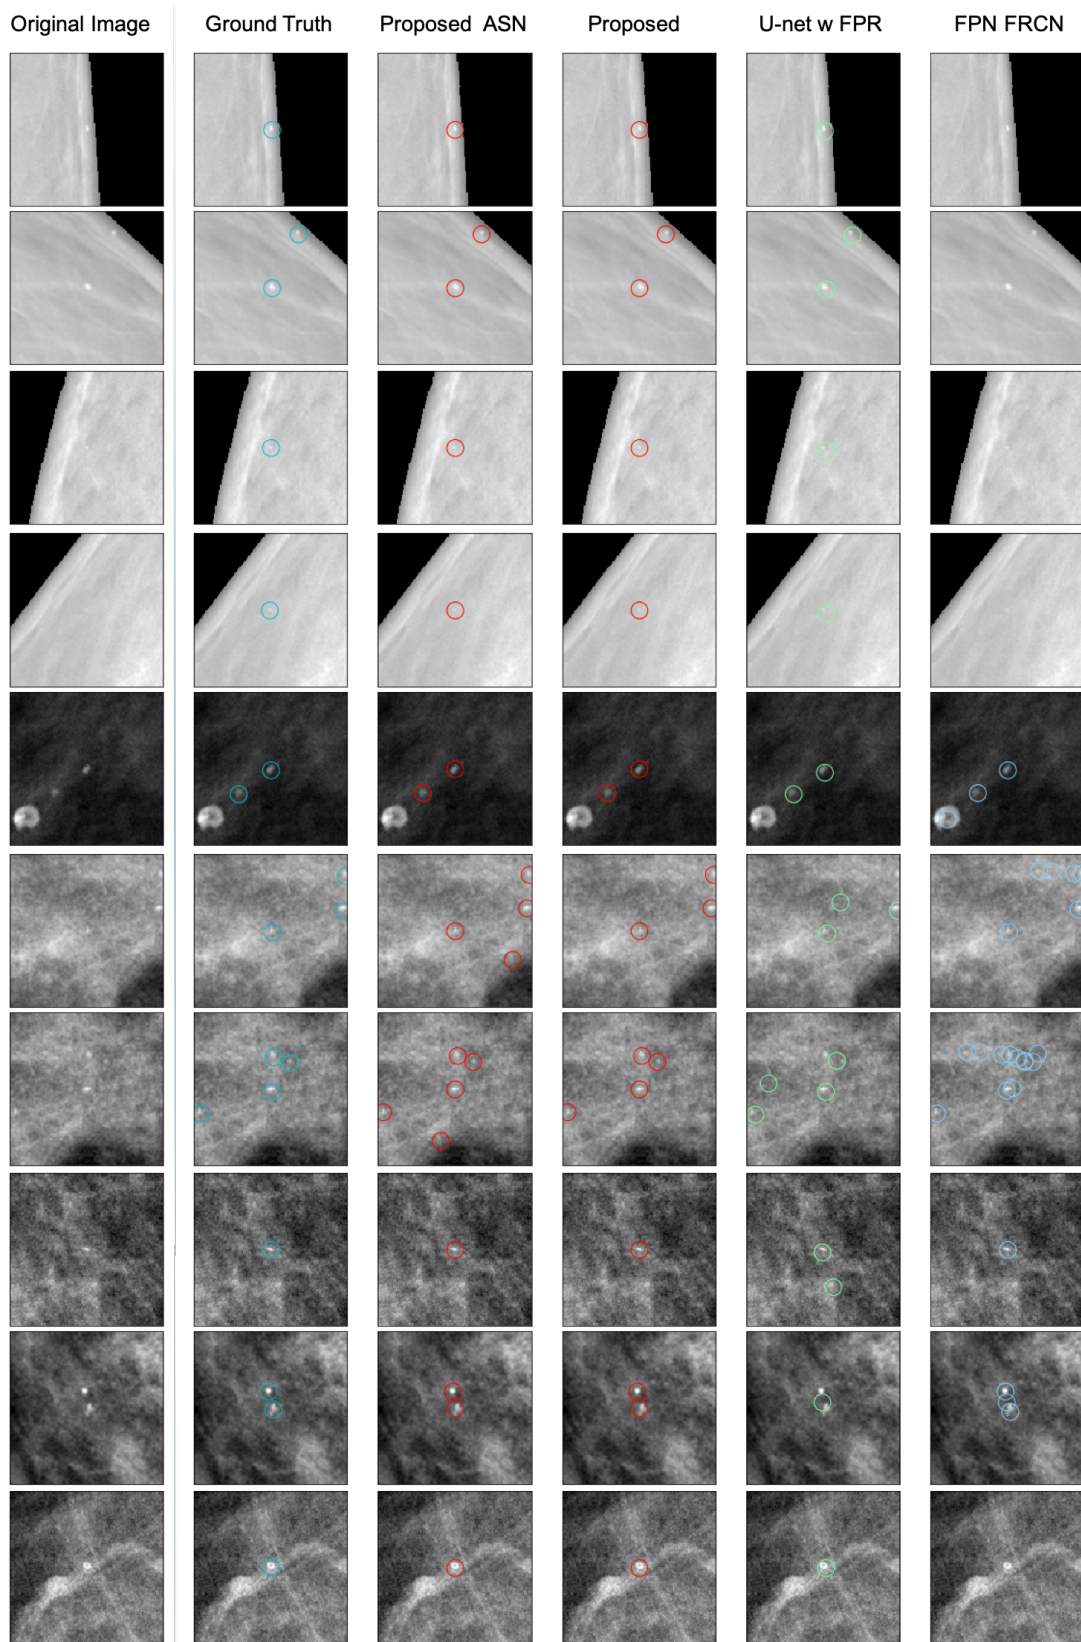

Figure 3. Additional detection results of INbreast.



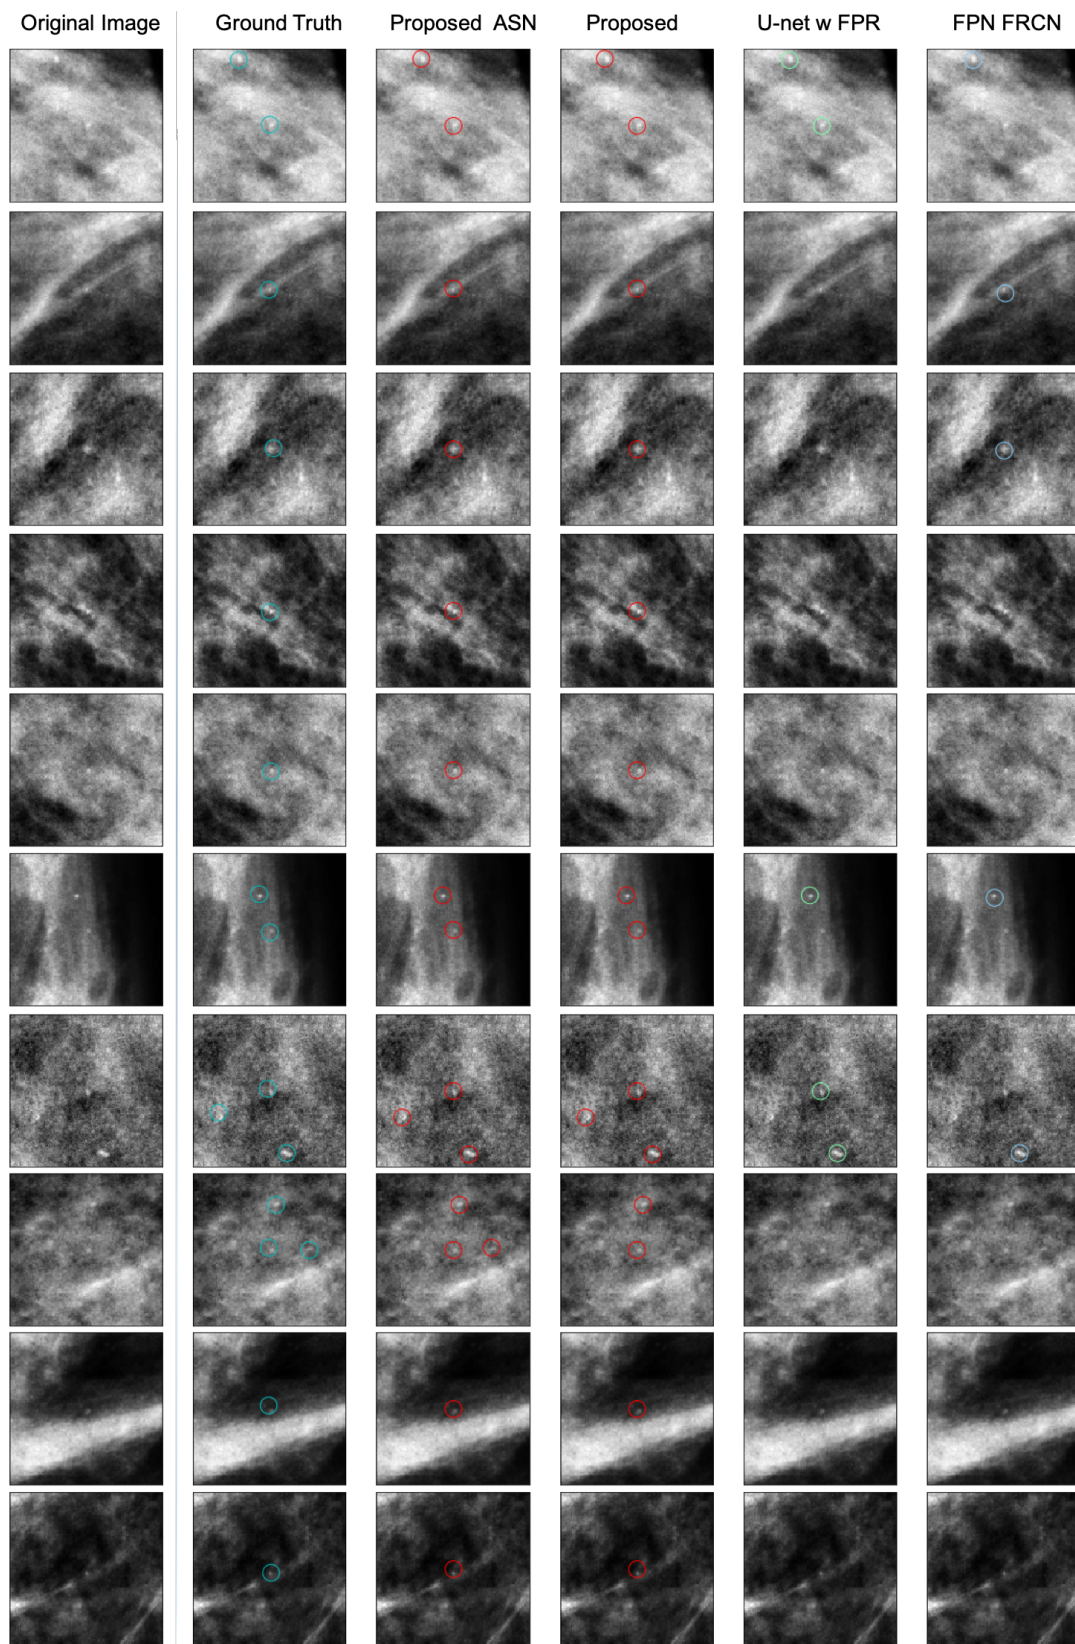

Figure 4. Additional detection results of in-house dataset.

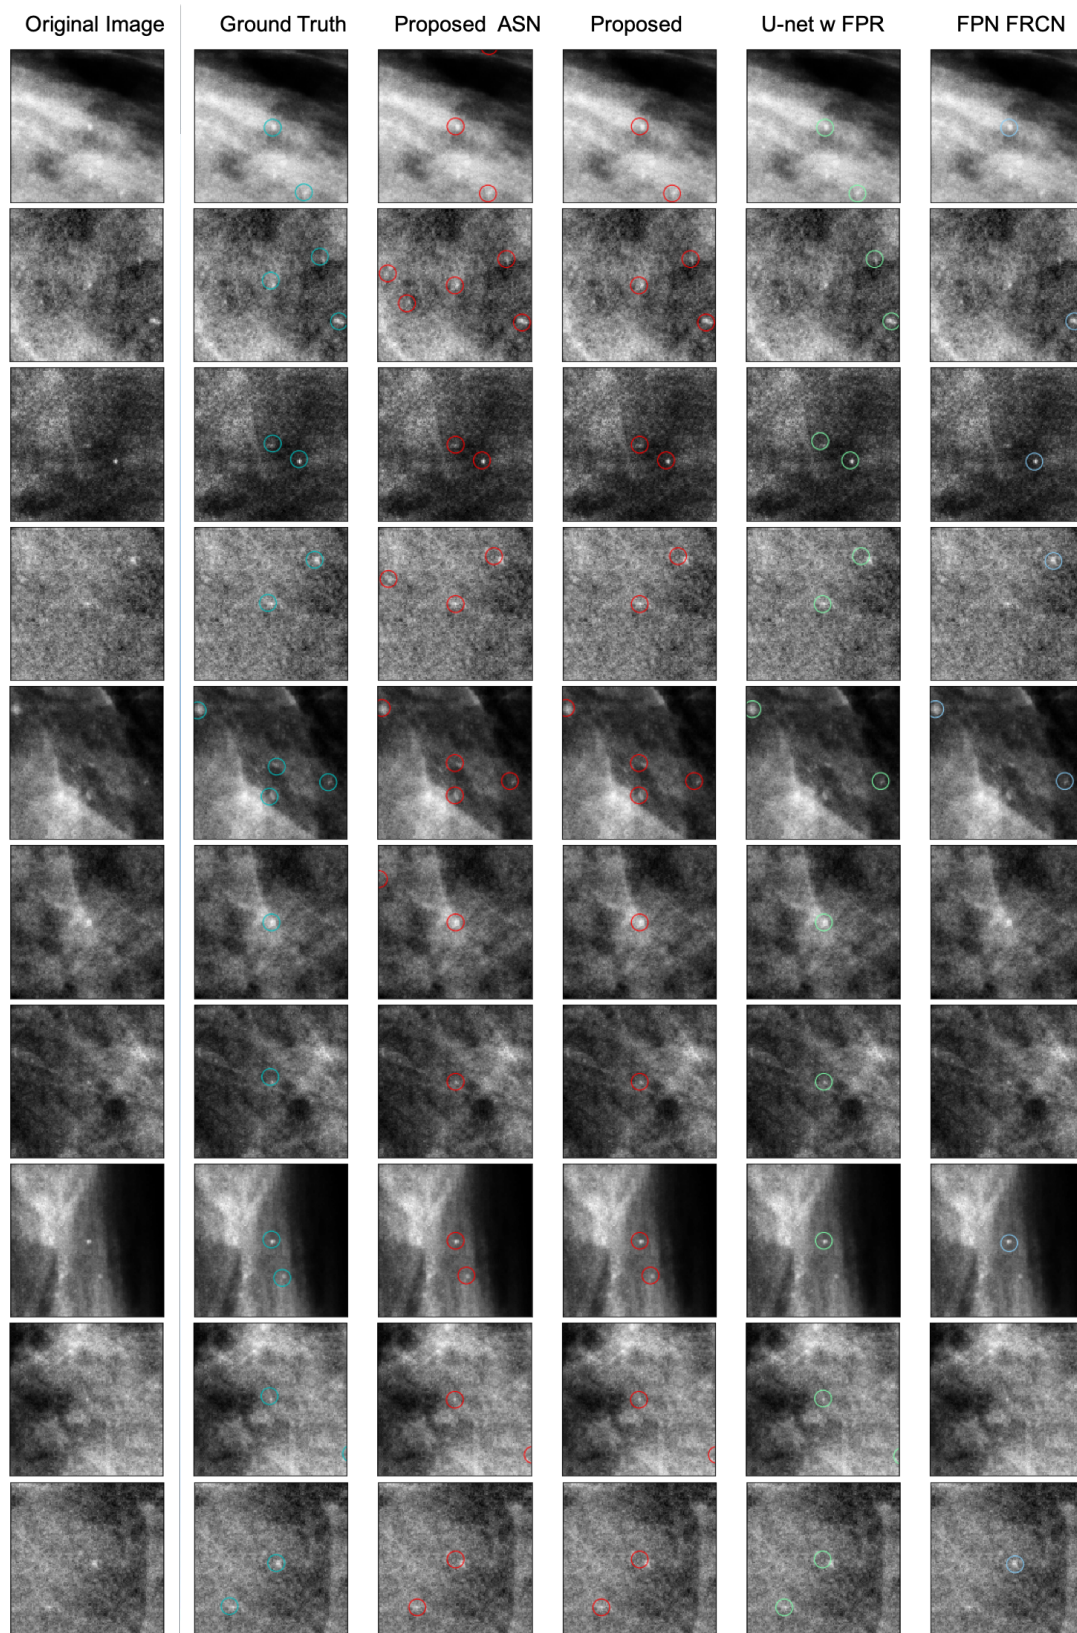

Figure 5. Additional detection results of in-house dataset.



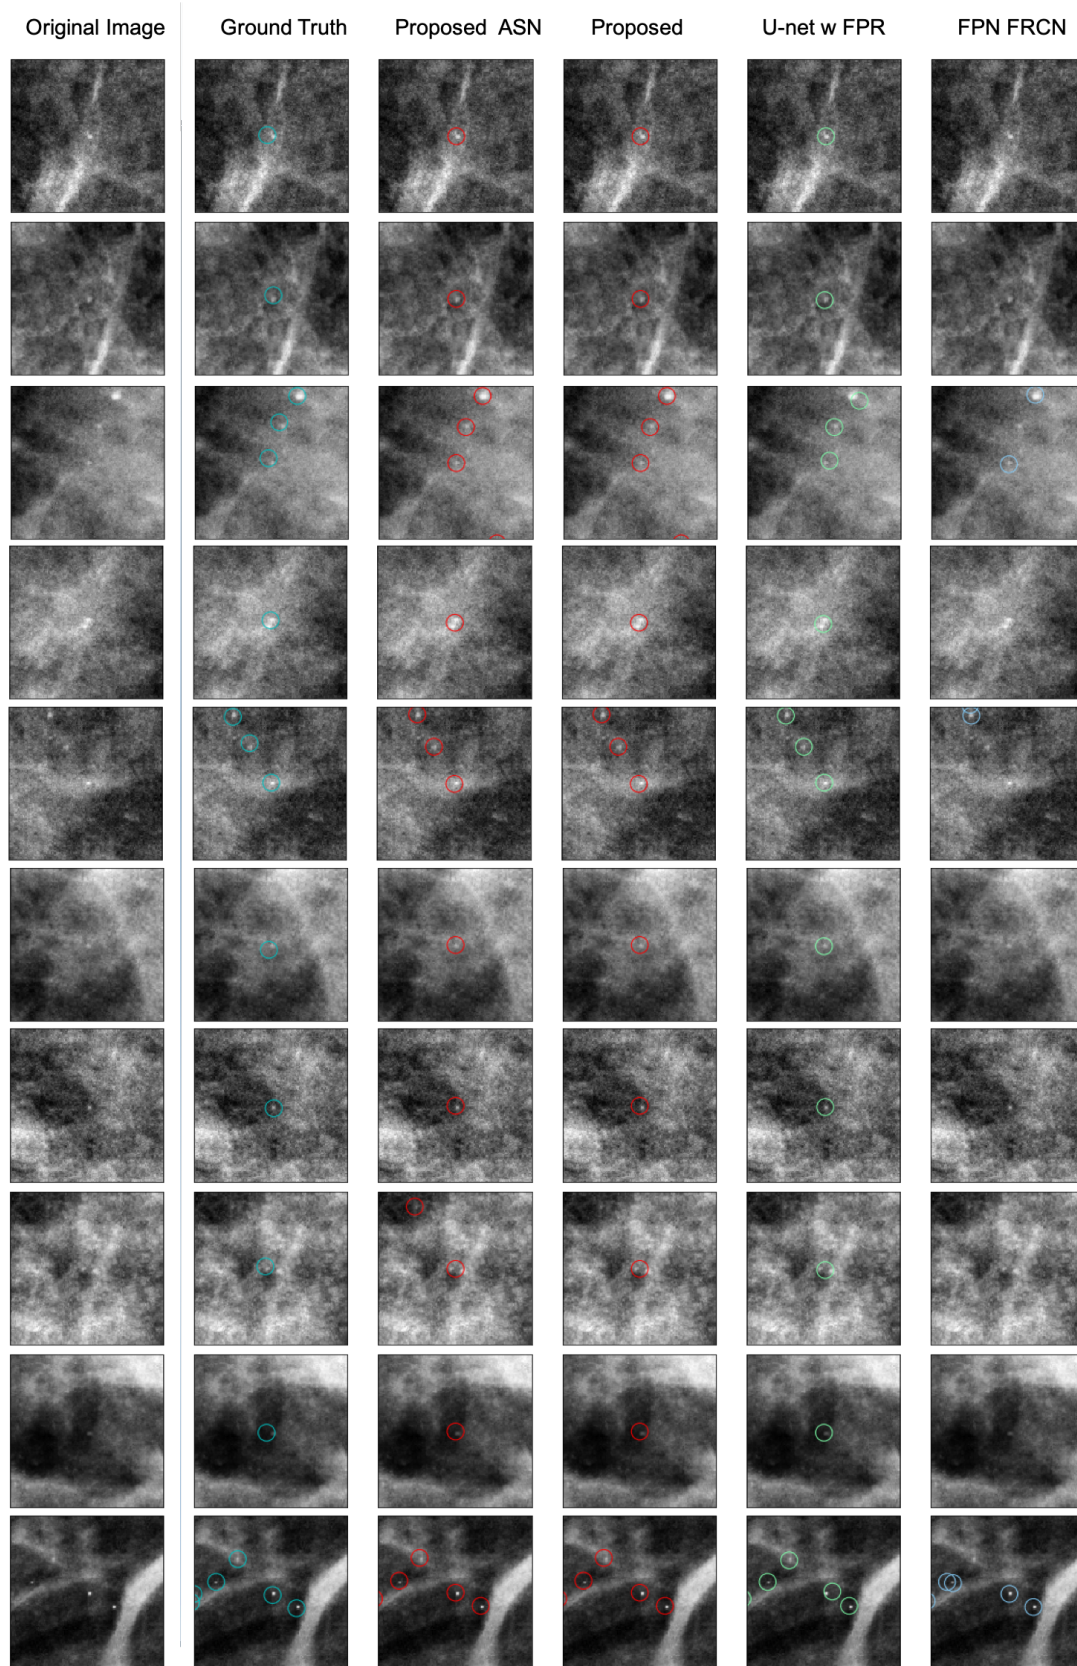

Figure 6. Additional detection results of in-house dataset.



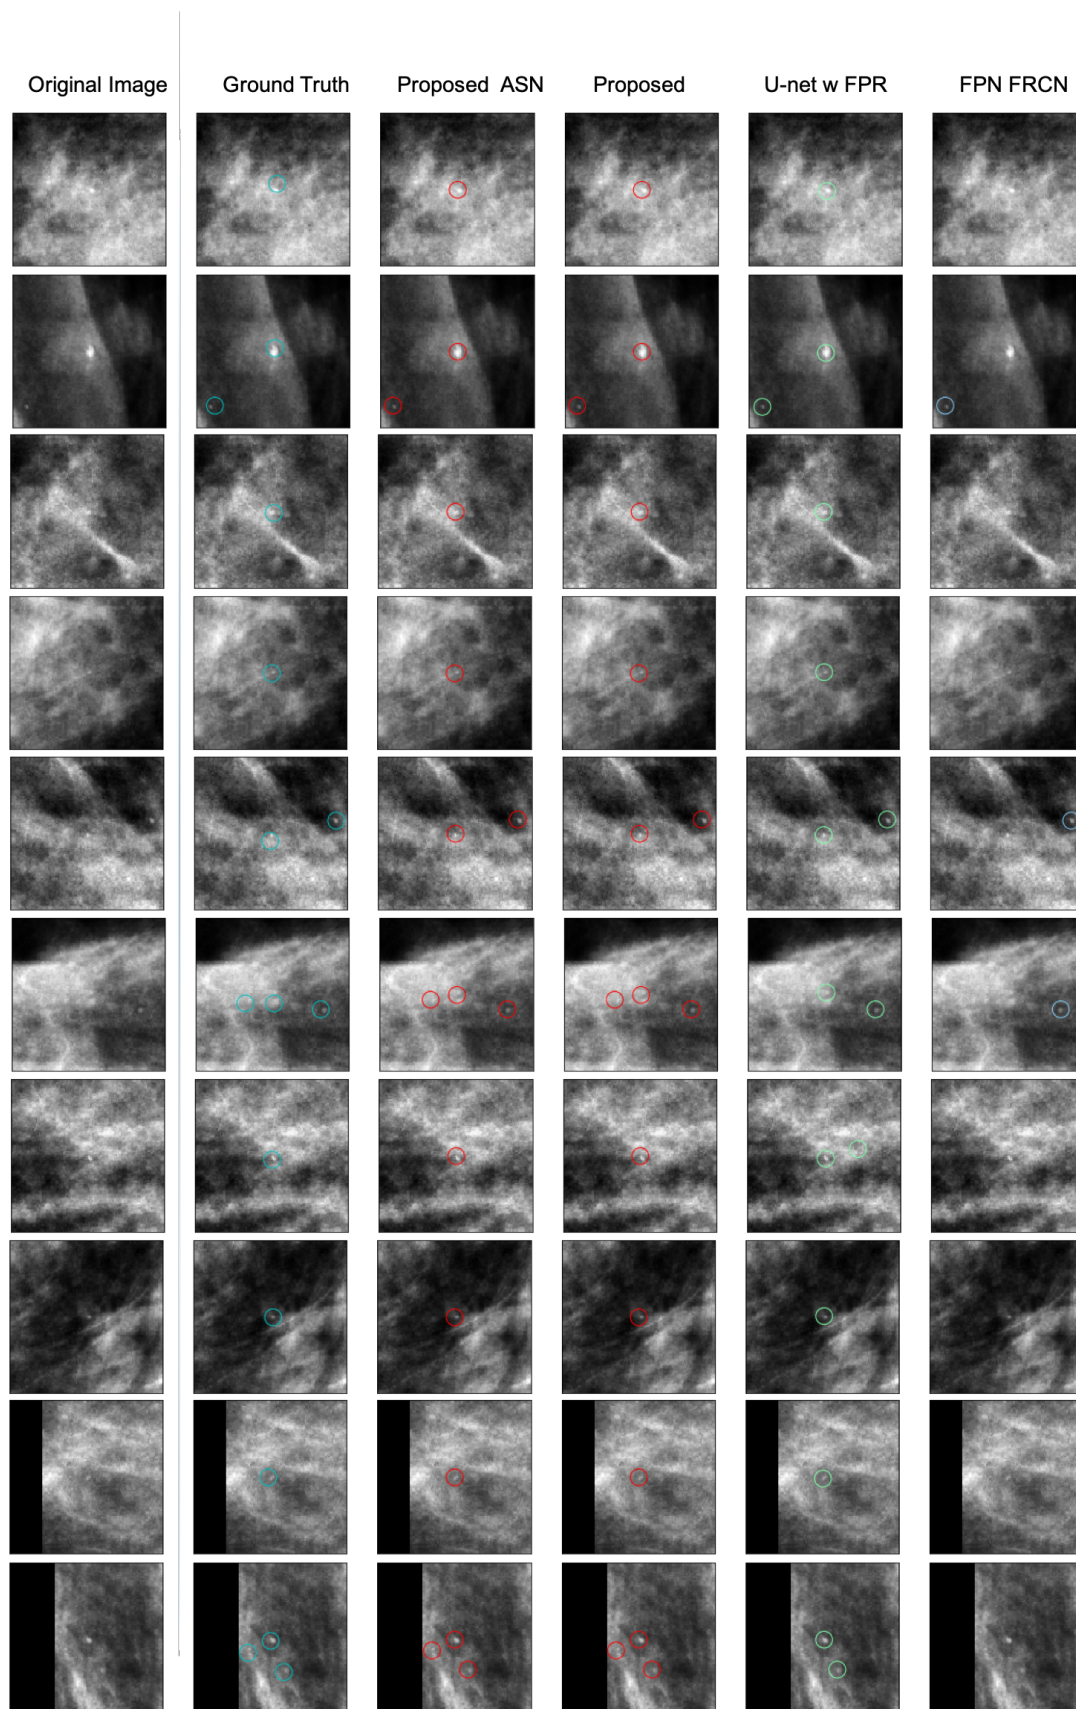

Figure 7. Additional detection results of in-house dataset.

### 3. Set division of INbreast

In the end, we provide the image name list of our train/valid/test division on public dataset INbreast.

**Train set:**

20587994\_024ee3569b2605dc\_MG\_R\_CC\_ANON  
20588020\_024ee3569b2605dc\_MG\_L\_CC\_ANON  
20588046\_024ee3569b2605dc\_MG\_R\_ML\_ANON  
20588072\_024ee3569b2605dc\_MG\_L\_ML\_ANON  
20588458\_bf1a6aaadb05e3df\_MG\_R\_CC\_ANON  
20588510\_bf1a6aaadb05e3df\_MG\_R\_ML\_ANON  
20588536\_bf1a6aaadb05e3df\_MG\_L\_ML\_ANON  
20588562\_bf1a6aaadb05e3df\_MG\_L\_CC\_ANON  
20588654\_036aff49b8ac84f0\_MG\_R\_ML\_ANON  
20588680\_036aff49b8ac84f0\_MG\_L\_ML\_ANON  
22427840\_bbd6a3a35438c11b\_MG\_R\_CC\_ANON  
22427864\_bbd6a3a35438c11b\_MG\_L\_CC\_ANON  
22579730\_bbd6a3a35438c11b\_MG\_R\_ML\_ANON  
22579754\_bbd6a3a35438c11b\_MG\_L\_ML\_ANON  
22580341\_5eae9beae14d26fd\_MG\_R\_CC\_ANON  
22580367\_5eae9beae14d26fd\_MG\_L\_CC\_ANON  
22580393\_5eae9beae14d26fd\_MG\_R\_ML\_ANON  
22580419\_5eae9beae14d26fd\_MG\_L\_ML\_ANON  
22613918\_f23fa352e7de3dc7\_MG\_R\_CC\_ANON  
22613944\_f23fa352e7de3dc7\_MG\_L\_CC\_ANON  
22613970\_f23fa352e7de3dc7\_MG\_R\_ML\_ANON  
22613996\_f23fa352e7de3dc7\_MG\_L\_ML\_ANON  
22614499\_2dec4948fbe6336d\_MG\_R\_CC\_ANON  
22614522\_2dec4948fbe6336d\_MG\_L\_CC\_ANON  
22614545\_2dec4948fbe6336d\_MG\_R\_ML\_ANON  
22614568\_2dec4948fbe6336d\_MG\_L\_ML\_ANON  
22670278\_98429c0bdf78c0c7\_MG\_R\_CC\_ANON  
22670301\_98429c0bdf78c0c7\_MG\_L\_CC\_ANON  
22670324\_98429c0bdf78c0c7\_MG\_R\_ML\_ANON  
22670347\_98429c0bdf78c0c7\_MG\_L\_ML\_ANON  
22670809\_0b7396cdccacca82\_MG\_R\_CC\_ANON  
22670832\_0b7396cdccacca82\_MG\_L\_CC\_ANON  
22670855\_0b7396cdccacca82\_MG\_R\_ML\_ANON  
22670878\_0b7396cdccacca82\_MG\_L\_ML\_ANON  
22670978\_f571fd4e63c718e3\_MG\_L\_CC\_ANON  
22671003\_f571fd4e63c718e3\_MG\_L\_ML\_ANON  
22678449\_60995d51033e24b8\_MG\_R\_CC\_ANON  
22678472\_60995d51033e24b8\_MG\_L\_CC\_ANON  
22678495\_60995d51033e24b8\_MG\_R\_ML\_ANON  
22678518\_60995d51033e24b8\_MG\_L\_ML\_ANON  
24055725\_f0f1a133837b5137\_MG\_L\_ML\_ANON  
24055752\_f0f1a133837b5137\_MG\_R\_ML\_ANON  
24055779\_f0f1a133837b5137\_MG\_L\_CC\_ANON  
24055806\_f0f1a133837b5137\_MG\_R\_CC\_ANON  
24055877\_839819f2eadaf325\_MG\_L\_ML\_ANON  
24055904\_839819f2eadaf325\_MG\_R\_ML\_ANON  
24055931\_839819f2eadaf325\_MG\_L\_CC\_ANON  
24055958\_839819f2eadaf325\_MG\_R\_CC\_ANON  
24058660\_9e8db9e34d5275ef\_MG\_R\_CC\_ANON

24058686\_9e8db9e34d5275ef\_MG\_L\_CC\_ANON  
24058712\_9e8db9e34d5275ef\_MG\_R\_ML\_ANON  
24058738\_9e8db9e34d5275ef\_MG\_L\_ML\_ANON  
50994110\_cc9e66c5b31baab8\_MG\_L\_ML\_ANON  
50994137\_cc9e66c5b31baab8\_MG\_R\_ML\_ANON  
50994164\_cc9e66c5b31baab8\_MG\_L\_CC\_ANON  
50994191\_cc9e66c5b31baab8\_MG\_R\_CC\_ANON  
50994273\_cc9e66c5b31baab8\_MG\_R\_CC\_ANON  
50994300\_cc9e66c5b31baab8\_MG\_R\_FB\_ANON  
50994327\_cc9e66c5b31baab8\_MG\_L\_ML\_ANON  
50994354\_cc9e66c5b31baab8\_MG\_R\_ML\_ANON  
50994381\_cc9e66c5b31baab8\_MG\_L\_CC\_ANON  
50994408\_cc9e66c5b31baab8\_MG\_R\_CC\_ANON  
50996709\_330e5fe16929eed4\_MG\_R\_ML\_ANON  
50996736\_330e5fe16929eed4\_MG\_R\_CC\_ANON  
50997434\_97ec8cadfca70d32\_MG\_L\_ML\_ANON  
50997461\_97ec8cadfca70d32\_MG\_R\_ML\_ANON  
50997488\_97ec8cadfca70d32\_MG\_L\_CC\_ANON  
50997515\_97ec8cadfca70d32\_MG\_R\_CC\_ANON  
50998322\_1e4b534393d18753\_MG\_R\_ML\_ANON  
50998349\_1e4b534393d18753\_MG\_R\_CC\_ANON  
51049462\_6f64793857feb5d0\_MG\_L\_ML\_ANON  
51049489\_6f64793857feb5d0\_MG\_R\_ML\_ANON  
51049516\_6f64793857feb5d0\_MG\_L\_CC\_ANON  
51049543\_6f64793857feb5d0\_MG\_R\_CC\_ANON  
51049628\_6f64793857feb5d0\_MG\_L\_ML\_ANON  
51049655\_6f64793857feb5d0\_MG\_R\_ML\_ANON  
51049682\_6f64793857feb5d0\_MG\_L\_CC\_ANON  
51070197\_6f64793857feb5d0\_MG\_R\_CC\_ANON  
53581379\_b231a8ba4dd4214f\_MG\_L\_ML\_ANON  
53581406\_b231a8ba4dd4214f\_MG\_R\_ML\_ANON  
53581433\_b231a8ba4dd4214f\_MG\_L\_CC\_ANON  
53581460\_b231a8ba4dd4214f\_MG\_R\_CC\_ANON  
53582656\_465aa5ec1b59efc6\_MG\_L\_ML\_ANON  
53582683\_465aa5ec1b59efc6\_MG\_L\_CC\_ANON  
53582710\_465aa5ec1b59efc6\_MG\_R\_ML\_ANON  
53582737\_465aa5ec1b59efc6\_MG\_L\_ML\_ANON  
53582764\_465aa5ec1b59efc6\_MG\_R\_ML\_ANON  
53582791\_465aa5ec1b59efc6\_MG\_L\_CC\_ANON  
53582818\_465aa5ec1b59efc6\_MG\_R\_CC\_ANON  
53586724\_e5f3f68b9ce31228\_MG\_L\_ML\_ANON  
53586751\_e5f3f68b9ce31228\_MG\_R\_ML\_ANON  
53586778\_e5f3f68b9ce31228\_MG\_L\_CC\_ANON  
53586805\_e5f3f68b9ce31228\_MG\_R\_CC\_ANON  
20587294\_e634830794f5c1bd\_MG\_R\_CC\_ANON  
20587320\_e634830794f5c1bd\_MG\_L\_CC\_ANON  
20587346\_e634830794f5c1bd\_MG\_R\_ML\_ANON  
20587372\_e634830794f5c1bd\_MG\_L\_ML\_ANON  
20587466\_d571b5880ad2a016\_MG\_L\_CC\_ANON  
20587492\_d571b5880ad2a016\_MG\_R\_ML\_ANON  
20587518\_d571b5880ad2a016\_MG\_L\_ML\_ANON  
20587544\_d571b5880ad2a016\_MG\_R\_CC\_ANON  
22580015\_6200187f3f1ccc18\_MG\_R\_CC\_ANON



22580038\_6200187f3f1ccc18\_MG\_L\_CC\_ANON  
22580068\_6200187f3f1ccc18\_MG\_R\_ML\_ANON  
22580098\_6200187f3f1ccc18\_MG\_L\_ML\_ANON  
22580192\_5530d5782fc89dd7\_MG\_R\_CC\_ANON  
22580218\_5530d5782fc89dd7\_MG\_L\_CC\_ANON  
22580244\_5530d5782fc89dd7\_MG\_R\_ML\_ANON  
22580270\_5530d5782fc89dd7\_MG\_L\_ML\_ANON  
22580654\_fe7d005dcbbfb46d\_MG\_R\_CC\_ANON  
22580680\_fe7d005dcbbfb46d\_MG\_L\_CC\_ANON  
22580706\_fe7d005dcbbfb46d\_MG\_R\_ML\_ANON  
22580732\_fe7d005dcbbfb46d\_MG\_L\_ML\_ANON  
22613624\_dcfa6ba6374ec07\_MG\_R\_CC\_ANON  
22613650\_dcfa6ba6374ec07\_MG\_L\_CC\_ANON  
22613676\_dcfa6ba6374ec07\_MG\_R\_ML\_ANON  
22613702\_dcfa6ba6374ec07\_MG\_L\_ML\_ANON  
22678622\_61b13c59bcb4149e\_MG\_R\_CC\_ANON  
22678646\_61b13c59bcb4149e\_MG\_L\_CC\_ANON  
22678670\_61b13c59bcb4149e\_MG\_R\_ML\_ANON  
22678694\_61b13c59bcb4149e\_MG\_L\_ML\_ANON  
22678953\_b9a4da5f2dae63a9\_MG\_R\_CC\_ANON  
22678980\_b9a4da5f2dae63a9\_MG\_L\_CC\_ANON  
22679008\_b9a4da5f2dae63a9\_MG\_R\_ML\_ANON  
22679036\_b9a4da5f2dae63a9\_MG\_L\_ML\_ANON  
24054997\_2f1104b3cda7f145\_MG\_L\_ML\_ANON  
24055024\_2f1104b3cda7f145\_MG\_R\_ML\_ANON  
24055051\_2f1104b3cda7f145\_MG\_L\_CC\_ANON  
24055078\_2f1104b3cda7f145\_MG\_R\_CC\_ANON  
26933772\_f8bfddc28e8045c0\_MG\_R\_CC\_ANON  
26933801\_f8bfddc28e8045c0\_MG\_L\_CC\_ANON  
26933830\_f8bfddc28e8045c0\_MG\_R\_ML\_ANON  
26933859\_f8bfddc28e8045c0\_MG\_L\_ML\_ANON  
30011647\_6968748e66837bc7\_MG\_R\_CC\_ANON  
30011674\_6968748e66837bc7\_MG\_L\_CC\_ANON  
30011700\_6968748e66837bc7\_MG\_R\_ML\_ANON  
30011727\_6968748e66837bc7\_MG\_L\_ML\_ANON  
50993787\_de5e8d61e501a71b\_MG\_L\_ML\_ANON  
50993814\_de5e8d61e501a71b\_MG\_R\_ML\_ANON  
50993841\_de5e8d61e501a71b\_MG\_L\_CC\_ANON  
50993868\_de5e8d61e501a71b\_MG\_R\_CC\_ANON  
50993895\_de5e8d61e501a71b\_MG\_L\_ML\_ANON  
50993922\_de5e8d61e501a71b\_MG\_R\_ML\_ANON  
50993949\_de5e8d61e501a71b\_MG\_L\_CC\_ANON  
50993976\_de5e8d61e501a71b\_MG\_R\_CC\_ANON  
50996325\_6aba0b402889a16f\_MG\_L\_ML\_ANON  
50996352\_6aba0b402889a16f\_MG\_R\_ML\_ANON  
50996379\_6aba0b402889a16f\_MG\_L\_CC\_ANON  
50996406\_6aba0b402889a16f\_MG\_R\_CC\_ANON  
50998032\_66adfbb4f19c76d2\_MG\_R\_CC\_ANON  
50998059\_66adfbb4f19c76d2\_MG\_L\_ML\_ANON  
50998086\_66adfbb4f19c76d2\_MG\_R\_ML\_ANON  
50998113\_66adfbb4f19c76d2\_MG\_L\_CC\_ANON  
50998580\_cd12bc20b3d27d0b\_MG\_L\_ML\_ANON  
50998607\_cd12bc20b3d27d0b\_MG\_R\_ML\_ANON

50998634\_cd12bc20b3d27d0b\_MG\_L\_CC\_ANON  
50998661\_cd12bc20b3d27d0b\_MG\_R\_CC\_ANON  
53580611\_40e22f2e3215b954\_MG\_L\_ML\_ANON  
53580638\_40e22f2e3215b954\_MG\_R\_ML\_ANON  
53580665\_40e22f2e3215b954\_MG\_L\_CC\_ANON  
53580692\_40e22f2e3215b954\_MG\_R\_CC\_ANON  
53581124\_3be876aecfaad4ca\_MG\_L\_ML\_ANON  
53581151\_3be876aecfaad4ca\_MG\_L\_CC\_ANON  
53581769\_573747ee33ef6e5a\_MG\_L\_ML\_ANON  
53581796\_573747ee33ef6e5a\_MG\_L\_CC\_ANON  
53586960\_809e3f43339f93c6\_MG\_L\_ML\_ANON  
53586987\_809e3f43339f93c6\_MG\_R\_ML\_ANON  
53587014\_809e3f43339f93c6\_MG\_L\_CC\_ANON  
53587041\_809e3f43339f93c6\_MG\_R\_CC\_ANON  
53587104\_7b71aa9928e6975e\_MG\_L\_ML\_ANON  
53587131\_7b71aa9928e6975e\_MG\_L\_CC\_ANON  
53587427\_d2befe622e188943\_MG\_L\_ML\_ANON  
53587454\_d2befe622e188943\_MG\_R\_ML\_ANON  
53587481\_d2befe622e188943\_MG\_L\_CC\_ANON  
53587508\_d2befe622e188943\_MG\_R\_CC\_ANON  
53587663\_5fb370d4c1c71974\_MG\_R\_CC\_ANON  
53587690\_5fb370d4c1c71974\_MG\_L\_ML\_ANON  
53587717\_5fb370d4c1c71974\_MG\_R\_ML\_ANON  
53587744\_5fb370d4c1c71974\_MG\_L\_CC\_ANON  
20587054\_b6a4f750c6df4f90\_MG\_R\_CC\_ANON  
20587080\_b6a4f750c6df4f90\_MG\_R\_ML\_ANON  
20587148\_fd746d25eb40b3dc\_MG\_R\_CC\_ANON  
20587174\_fd746d25eb40b3dc\_MG\_L\_CC\_ANON  
20587200\_fd746d25eb40b3dc\_MG\_R\_ML\_ANON  
20587226\_fd746d25eb40b3dc\_MG\_L\_ML\_ANON  
20587612\_f4b2d377f43ba0bd\_MG\_R\_CC\_ANON  
20587638\_f4b2d377f43ba0bd\_MG\_L\_CC\_ANON  
20587664\_f4b2d377f43ba0bd\_MG\_R\_ML\_ANON  
20587690\_f4b2d377f43ba0bd\_MG\_L\_ML\_ANON  
20587758\_81cd83d2f4d78528\_MG\_L\_CC\_ANON  
20587784\_81cd83d2f4d78528\_MG\_R\_ML\_ANON  
20587810\_81cd83d2f4d78528\_MG\_L\_ML\_ANON  
20587836\_81cd83d2f4d78528\_MG\_R\_CC\_ANON  
20587902\_8dbbd4e51f549ff0\_MG\_R\_CC\_ANON  
20587928\_8dbbd4e51f549ff0\_MG\_R\_ML\_ANON  
20588308\_493155e17143edef\_MG\_L\_ML\_ANON  
20588334\_493155e17143edef\_MG\_L\_CC\_ANON  
22580492\_2a5b932da4ce5ca1\_MG\_R\_CC\_ANON  
22580520\_2a5b932da4ce5ca1\_MG\_L\_CC\_ANON  
22580548\_2a5b932da4ce5ca1\_MG\_R\_ML\_ANON  
22580576\_2a5b932da4ce5ca1\_MG\_L\_ML\_ANON  
22670094\_e1f51192f7bf3f5f\_MG\_R\_CC\_ANON  
22670124\_e1f51192f7bf3f5f\_MG\_L\_CC\_ANON  
22670147\_e1f51192f7bf3f5f\_MG\_R\_ML\_ANON  
22670177\_e1f51192f7bf3f5f\_MG\_L\_ML\_ANON  
22678787\_64a22c47765f0c5c\_MG\_R\_CC\_ANON  
22678810\_64a22c47765f0c5c\_MG\_L\_CC\_ANON  
22678833\_64a22c47765f0c5c\_MG\_R\_ML\_ANON

22678856\_64a22c47765f0c5c\_MG\_L\_ML\_ANON  
24055573\_6f1aef40b3775182\_MG\_L\_ML\_ANON  
24055600\_6f1aef40b3775182\_MG\_R\_ML\_ANON  
24055627\_6f1aef40b3775182\_MG\_L\_CC\_ANON  
24055654\_6f1aef40b3775182\_MG\_R\_CC\_ANON  
24065833\_c01f83a1eb283270\_MG\_L\_ML\_ANON  
24065860\_c01f83a1eb283270\_MG\_R\_ML\_ANON  
24065887\_c01f83a1eb283270\_MG\_L\_CC\_ANON  
24065914\_c01f83a1eb283270\_MG\_R\_CC\_ANON  
50994706\_069212ec65a94339\_MG\_R\_CC\_ANON  
50994733\_069212ec65a94339\_MG\_L\_ML\_ANON  
50994760\_069212ec65a94339\_MG\_R\_ML\_ANON  
50994787\_069212ec65a94339\_MG\_L\_CC\_ANON  
50994814\_069212ec65a94339\_MG\_L\_ML\_ANON  
50994841\_069212ec65a94339\_MG\_R\_ML\_ANON  
50994868\_069212ec65a94339\_MG\_L\_CC\_ANON  
50994895\_069212ec65a94339\_MG\_R\_CC\_ANON  
50995762\_0c735e8768d276b4\_MG\_R\_ML\_ANON  
50995789\_0c735e8768d276b4\_MG\_R\_CC\_ANON  
50996056\_71c1a60d57c5322f\_MG\_L\_ML\_ANON  
50996083\_71c1a60d57c5322f\_MG\_R\_ML\_ANON  
50996110\_71c1a60d57c5322f\_MG\_L\_CC\_ANON  
50996137\_71c1a60d57c5322f\_MG\_R\_CC\_ANON  
50996201\_8c1b2bd64ca4d778\_MG\_L\_ML\_ANON  
50996228\_8c1b2bd64ca4d778\_MG\_L\_CC\_ANON  
50997223\_9054942f7be52dd9\_MG\_L\_ML\_ANON  
50997250\_9054942f7be52dd9\_MG\_R\_ML\_ANON  
50997277\_9054942f7be52dd9\_MG\_L\_CC\_ANON  
50997304\_9054942f7be52dd9\_MG\_R\_CC\_ANON  
50997742\_cbb6c98a81e69eeb\_MG\_L\_ML\_ANON  
50997769\_cbb6c98a81e69eeb\_MG\_R\_ML\_ANON  
50997796\_cbb6c98a81e69eeb\_MG\_L\_CC\_ANON  
50997823\_cbb6c98a81e69eeb\_MG\_R\_CC\_ANON  
50998413\_1f139436acfc5467\_MG\_L\_ML\_ANON  
50998440\_1f139436acfc5467\_MG\_R\_ML\_ANON  
50998467\_1f139436acfc5467\_MG\_L\_CC\_ANON  
50998494\_1f139436acfc5467\_MG\_R\_CC\_ANON  
50998981\_a78eba834ef6ee88\_MG\_R\_ML\_ANON  
50999008\_a78eba834ef6ee88\_MG\_R\_CC\_ANON  
50999094\_cb65e8dac169f596\_MG\_L\_ML\_ANON  
50999121\_cb65e8dac169f596\_MG\_R\_ML\_ANON  
50999148\_cb65e8dac169f596\_MG\_L\_CC\_ANON  
50999175\_cb65e8dac169f596\_MG\_R\_CC\_ANON  
50999246\_cb65e8dac169f596\_MG\_L\_ML\_ANON  
50999273\_cb65e8dac169f596\_MG\_R\_ML\_ANON  
50999300\_cb65e8dac169f596\_MG\_L\_CC\_ANON  
50999327\_cb65e8dac169f596\_MG\_R\_CC\_ANON  
53580804\_51bec6477a7898b9\_MG\_L\_ML\_ANON  
53580831\_51bec6477a7898b9\_MG\_R\_ML\_ANON  
53580858\_51bec6477a7898b9\_MG\_L\_CC\_ANON  
53580885\_51bec6477a7898b9\_MG\_R\_CC\_ANON  
53580979\_4c341dad22471922\_MG\_L\_ML\_ANON  
53581006\_4c341dad22471922\_MG\_R\_ML\_ANON



53581033\_4c341dad22471922\_MG\_L\_CC\_ANON  
53581060\_4c341dad22471922\_MG\_R\_CC\_ANON

**Valid set:**

20586908\_6c613a14b80a8591\_MG\_R\_CC\_ANON  
20586934\_6c613a14b80a8591\_MG\_L\_CC\_ANON  
20586960\_6c613a14b80a8591\_MG\_R\_ML\_ANON  
20586986\_6c613a14b80a8591\_MG\_L\_ML\_ANON  
22427682\_d713ef5849f98b6c\_MG\_R\_CC\_ANON  
22427705\_d713ef5849f98b6c\_MG\_L\_CC\_ANON  
22427728\_d713ef5849f98b6c\_MG\_R\_ML\_ANON  
22427751\_d713ef5849f98b6c\_MG\_L\_ML\_ANON  
22579847\_301f1776aebbf5d2\_MG\_R\_CC\_ANON  
22579870\_301f1776aebbf5d2\_MG\_L\_CC\_ANON  
22579893\_301f1776aebbf5d2\_MG\_R\_ML\_ANON  
22579916\_301f1776aebbf5d2\_MG\_L\_ML\_ANON  
22613770\_45c7f44839fd9e68\_MG\_R\_CC\_ANON  
22613796\_45c7f44839fd9e68\_MG\_L\_CC\_ANON  
22613822\_45c7f44839fd9e68\_MG\_R\_ML\_ANON  
22613848\_45c7f44839fd9e68\_MG\_L\_ML\_ANON  
22614074\_6bd24a0a42c19ce1\_MG\_R\_CC\_ANON  
22614097\_6bd24a0a42c19ce1\_MG\_L\_CC\_ANON  
22614127\_6bd24a0a42c19ce1\_MG\_R\_ML\_ANON  
22614150\_6bd24a0a42c19ce1\_MG\_L\_ML\_ANON  
22670442\_7e677f3d530e41ed\_MG\_R\_CC\_ANON  
22670465\_7e677f3d530e41ed\_MG\_L\_CC\_ANON  
22670488\_7e677f3d530e41ed\_MG\_R\_ML\_ANON  
22670511\_7e677f3d530e41ed\_MG\_L\_ML\_ANON  
22670620\_e15a16f87b4f9782\_MG\_R\_CC\_ANON  
22670643\_e15a16f87b4f9782\_MG\_L\_CC\_ANON  
22670673\_e15a16f87b4f9782\_MG\_R\_ML\_ANON  
22670703\_e15a16f87b4f9782\_MG\_L\_ML\_ANON  
24055149\_606e9b184978a350\_MG\_L\_ML\_ANON  
24055176\_606e9b184978a350\_MG\_R\_ML\_ANON  
24055203\_606e9b184978a350\_MG\_L\_CC\_ANON  
24065251\_c4b995eddb3c510c\_MG\_L\_ML\_ANON  
24065270\_c4b995eddb3c510c\_MG\_R\_ML\_ANON  
24065289\_c4b995eddb3c510c\_MG\_L\_CC\_ANON  
24065308\_c4b995eddb3c510c\_MG\_R\_CC\_ANON  
24065530\_d8205a09c8173f44\_MG\_L\_ML\_ANON  
24065557\_d8205a09c8173f44\_MG\_R\_ML\_ANON  
24065584\_d8205a09c8173f44\_MG\_L\_CC\_ANON  
24065611\_d8205a09c8173f44\_MG\_R\_CC\_ANON  
27829134\_fbb55bf7fff48540\_MG\_R\_CC\_ANON  
27829161\_fbb55bf7fff48540\_MG\_L\_CC\_ANON  
27829188\_fbb55bf7fff48540\_MG\_R\_ML\_ANON  
27829215\_fbb55bf7fff48540\_MG\_L\_ML\_ANON  
50994535\_de4c34099d6ef8de\_MG\_R\_ML\_ANON  
50994562\_de4c34099d6ef8de\_MG\_R\_CC\_ANON  
50994589\_de4c34099d6ef8de\_MG\_R\_ML\_ANON  
50994616\_de4c34099d6ef8de\_MG\_R\_CC\_ANON  
50995963\_d742ec2f9b90aa62\_MG\_L\_ML\_ANON  
50995990\_d742ec2f9b90aa62\_MG\_L\_CC\_ANON

50996800\_fdf4a1516f88b280\_MG\_L\_ML\_ANON  
50996827\_fdf4a1516f88b280\_MG\_R\_ML\_ANON  
50996854\_fdf4a1516f88b280\_MG\_L\_CC\_ANON  
50996881\_fdf4a1516f88b280\_MG\_R\_CC\_ANON  
51048738\_3f22cdda8da215e3\_MG\_R\_ML\_ANON  
51048765\_3f22cdda8da215e3\_MG\_R\_CC\_ANON  
51049249\_832ebce700241036\_MG\_L\_CC\_ANON  
51049276\_832ebce700241036\_MG\_L\_ML\_ANON  
53581237\_80123a24997098dc\_MG\_R\_ML\_ANON  
53581264\_80123a24997098dc\_MG\_R\_CC\_ANON  
53582304\_8913a7e0cf3bd74e\_MG\_R\_ML\_ANON  
53582331\_8913a7e0cf3bd74e\_MG\_R\_CC\_ANON  
53582395\_3f0db31711fc9795\_MG\_L\_ML\_ANON  
53582422\_3f0db31711fc9795\_MG\_R\_ML\_ANON  
53582449\_3f0db31711fc9795\_MG\_L\_CC\_ANON  
53582476\_3f0db31711fc9795\_MG\_R\_CC\_ANON  
53586361\_dda3c6969a34ff8e\_MG\_L\_ML\_ANON  
53586388\_dda3c6969a34ff8e\_MG\_R\_ML\_ANON  
53586415\_dda3c6969a34ff8e\_MG\_L\_CC\_ANON  
53586442\_dda3c6969a34ff8e\_MG\_R\_CC\_ANON  
53587572\_11e6732579acf692\_MG\_L\_ML\_ANON  
53587599\_11e6732579acf692\_MG\_L\_CC\_ANON

**Test set:**

20588138\_8d0b9620c53c0268\_MG\_R\_ML\_ANON  
20588164\_8d0b9620c53c0268\_MG\_R\_CC\_ANON  
20588190\_8d0b9620c53c0268\_MG\_L\_CC\_ANON  
20588216\_8d0b9620c53c0268\_MG\_L\_ML\_ANON  
22614236\_1e5c3af078f74b05\_MG\_L\_CC\_ANON  
22614266\_1e5c3af078f74b05\_MG\_L\_ML\_ANON  
22614353\_d065adcb9905b973\_MG\_R\_CC\_ANON  
22614379\_d065adcb9905b973\_MG\_L\_CC\_ANON  
22614405\_d065adcb9905b973\_MG\_R\_ML\_ANON  
22614431\_d065adcb9905b973\_MG\_L\_ML\_ANON  
24055274\_1e10aef17c9fe149\_MG\_L\_ML\_ANON  
24055328\_1e10aef17c9fe149\_MG\_R\_ML\_ANON  
24055355\_1e10aef17c9fe149\_MG\_L\_CC\_ANON  
24055382\_1e10aef17c9fe149\_MG\_R\_CC\_ANON  
24055445\_ac3185e18ffdc7b6\_MG\_L\_ML\_ANON  
24055464\_ac3185e18ffdc7b6\_MG\_R\_ML\_ANON  
24055483\_ac3185e18ffdc7b6\_MG\_L\_CC\_ANON  
24055502\_ac3185e18ffdc7b6\_MG\_R\_CC\_ANON  
24065380\_83db89f57aea498a\_MG\_L\_ML\_ANON  
24065407\_83db89f57aea498a\_MG\_R\_ML\_ANON  
24065434\_83db89f57aea498a\_MG\_L\_CC\_ANON  
24065461\_83db89f57aea498a\_MG\_R\_CC\_ANON  
24065680\_5291e1aee2bbf5df\_MG\_L\_ML\_ANON  
24065707\_5291e1aee2bbf5df\_MG\_R\_ML\_ANON  
24065734\_5291e1aee2bbf5df\_MG\_L\_CC\_ANON  
24065761\_5291e1aee2bbf5df\_MG\_R\_CC\_ANON  
30011484\_349323117bf0fd93\_MG\_R\_CC\_ANON  
30011507\_349323117bf0fd93\_MG\_L\_CC\_ANON  
30011530\_349323117bf0fd93\_MG\_R\_ML\_ANON

30011553\_349323117bf0fd93\_MG\_L\_ML\_ANON  
30011798\_4f20c1285d8f0b1f\_MG\_R\_CC\_ANON  
30011824\_4f20c1285d8f0b1f\_MG\_L\_CC\_ANON  
30011850\_4f20c1285d8f0b1f\_MG\_R\_ML\_ANON  
30318067\_4f20c1285d8f0b1f\_MG\_L\_ML\_ANON  
50993399\_5d85ecc9cf26b254\_MG\_L\_ML\_ANON  
50993426\_5d85ecc9cf26b254\_MG\_L\_CC\_ANON  
50993616\_b03f1dd34eb3c55f\_MG\_L\_ML\_ANON  
50993643\_b03f1dd34eb3c55f\_MG\_L\_CC\_ANON  
50993670\_b03f1dd34eb3c55f\_MG\_L\_ML\_ANON  
50993697\_b03f1dd34eb3c55f\_MG\_L\_CC\_ANON  
50995872\_c94d8a1ebd452afe\_MG\_L\_ML\_ANON  
50995899\_c94d8a1ebd452afe\_MG\_L\_CC\_ANON  
50996945\_ce5e5e18a261cd29\_MG\_L\_ML\_ANON  
50996972\_ce5e5e18a261cd29\_MG\_R\_ML\_ANON  
50996999\_ce5e5e18a261cd29\_MG\_L\_CC\_ANON  
50997026\_ce5e5e18a261cd29\_MG\_R\_CC\_ANON  
50997053\_ce5e5e18a261cd29\_MG\_L\_CC\_ANON  
50997080\_ce5e5e18a261cd29\_MG\_L\_ML\_ANON  
50997107\_ce5e5e18a261cd29\_MG\_R\_ML\_ANON  
50997134\_ce5e5e18a261cd29\_MG\_R\_CC\_ANON  
50997597\_67cc8c9939d74a9a\_MG\_L\_ML\_ANON  
50997624\_67cc8c9939d74a9a\_MG\_R\_ML\_ANON  
50997651\_67cc8c9939d74a9a\_MG\_L\_CC\_ANON  
50997678\_67cc8c9939d74a9a\_MG\_R\_CC\_ANON  
50998177\_f34ee0ab6591b792\_MG\_L\_ML\_ANON  
50998204\_f34ee0ab6591b792\_MG\_R\_ML\_ANON  
50998231\_f34ee0ab6591b792\_MG\_L\_CC\_ANON  
50998258\_f34ee0ab6591b792\_MG\_R\_CC\_ANON  
50999432\_f62fbf38fb208316\_MG\_L\_ML\_ANON  
50999459\_f62fbf38fb208316\_MG\_L\_CC\_ANON  
51048891\_f3e93e889a7746f0\_MG\_L\_ML\_ANON  
51048918\_f3e93e889a7746f0\_MG\_R\_ML\_ANON  
51048945\_f3e93e889a7746f0\_MG\_L\_CC\_ANON  
51048972\_f3e93e889a7746f0\_MG\_R\_CC\_ANON  
51049053\_8c105bb715bf1c3c\_MG\_L\_ML\_ANON  
51049080\_8c105bb715bf1c3c\_MG\_R\_ML\_ANON  
51049107\_8c105bb715bf1c3c\_MG\_L\_CC\_ANON  
51049134\_8c105bb715bf1c3c\_MG\_R\_CC\_ANON  
53581860\_21e6cc12630e5e9f\_MG\_L\_ML\_ANON  
53581887\_21e6cc12630e5e9f\_MG\_R\_ML\_ANON  
53581914\_21e6cc12630e5e9f\_MG\_L\_CC\_ANON  
53581941\_21e6cc12630e5e9f\_MG\_R\_CC\_ANON  
53582540\_3e73f1c0670cfb0a\_MG\_R\_ML\_ANON  
53582567\_3e73f1c0670cfb0a\_MG\_R\_CC\_ANON  
53586869\_6ac23356b912ee9b\_MG\_L\_ML\_ANON  
53586896\_6ac23356b912ee9b\_MG\_L\_CC\_ANON
